# Supplementary material for: Therapeutic Interaction of Apatinib and Chidamide in T-cell Acute Lymphoblastic Leukemia through Interference with Mitochondria Associated Biogenesis and Intrinsic Apoptosis
Source: MDPI journal article supplement (doi:10.3390/jpm11100977), 2021-09-29
Supplement: s1 [file s1]

**A****Jurkat 24h**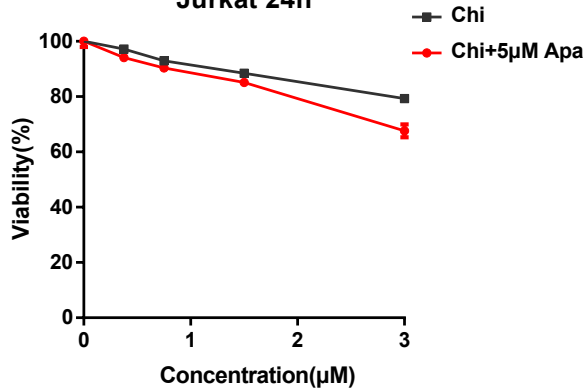**B****Molt4 24h**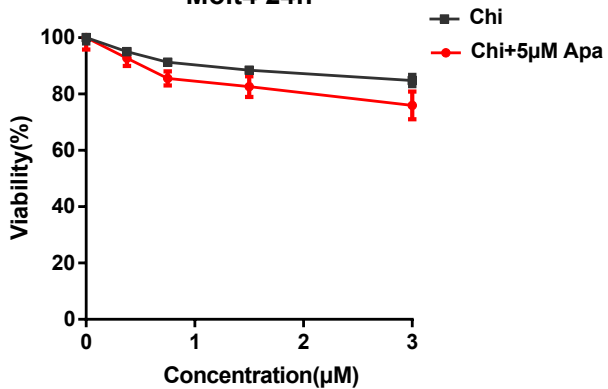

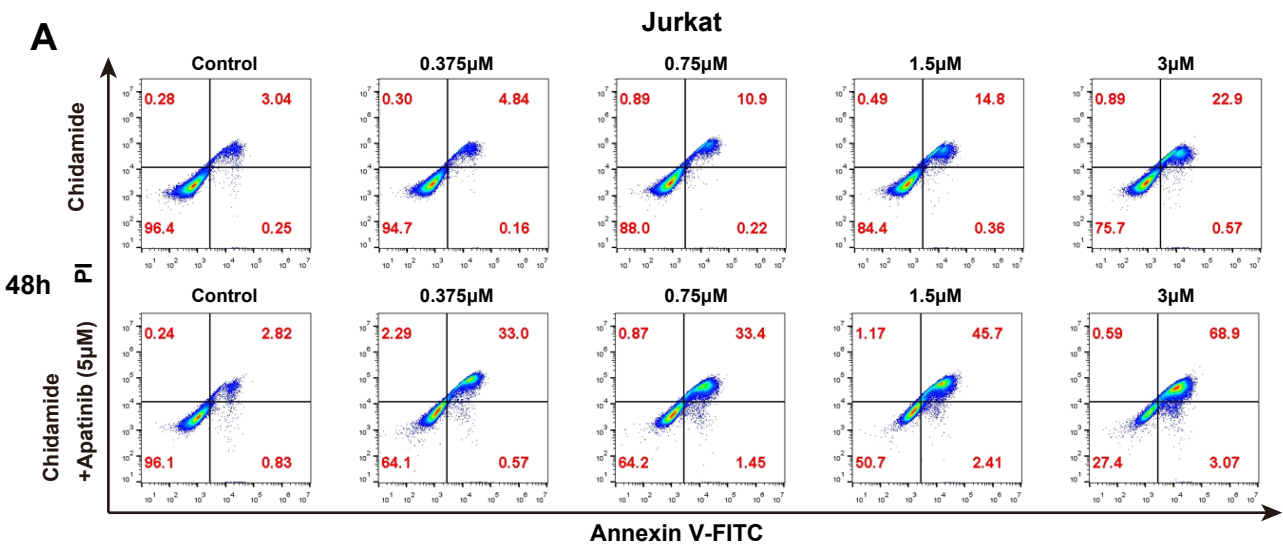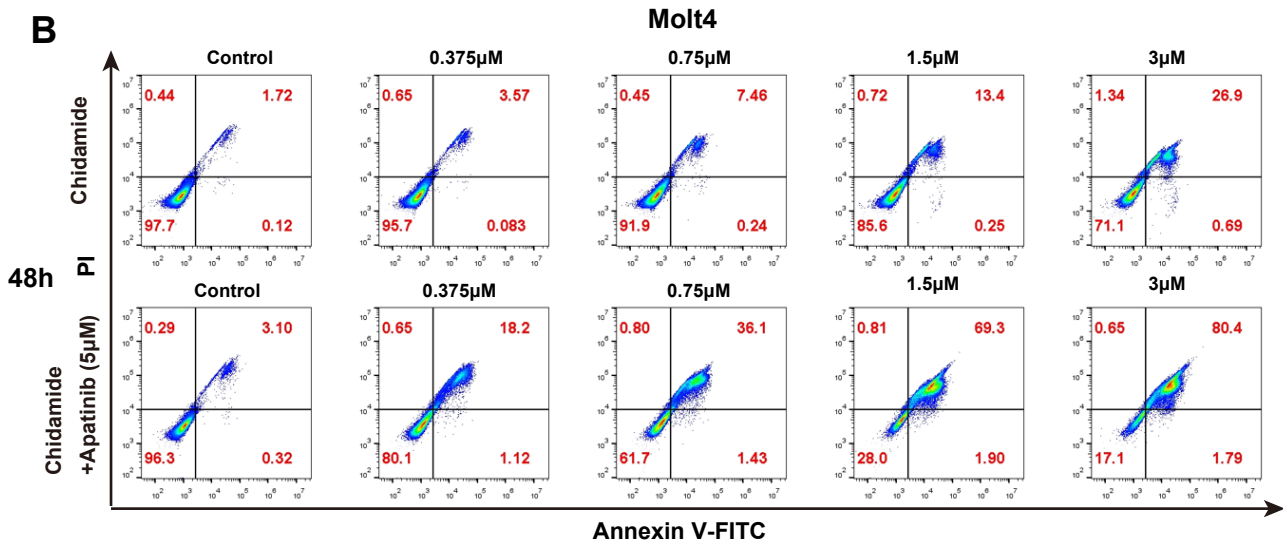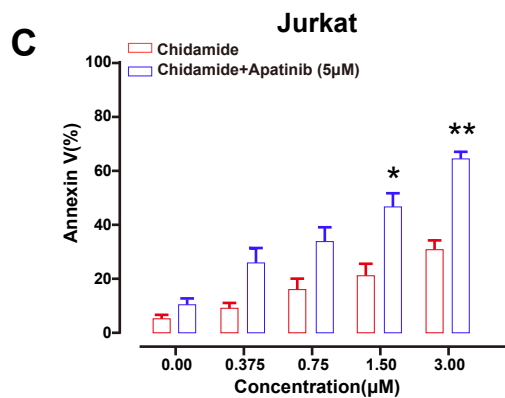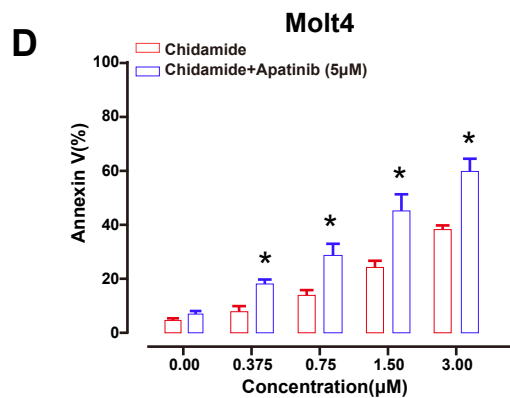

**A****hCD45 in BM**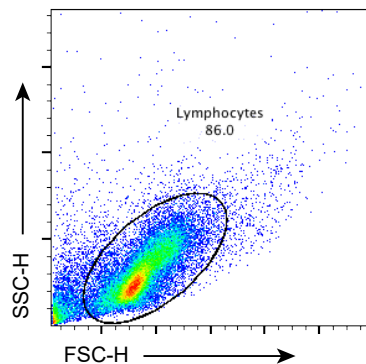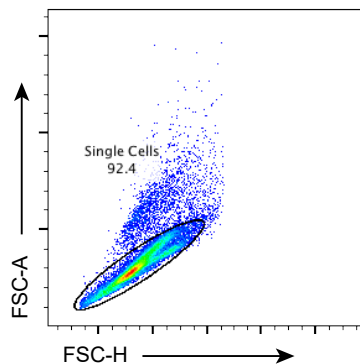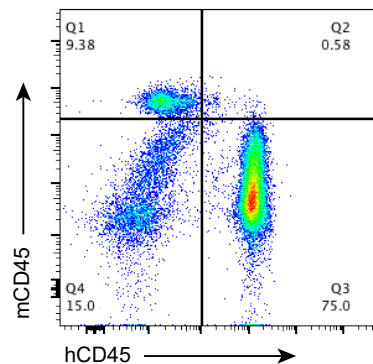**B****hCD45 in SP**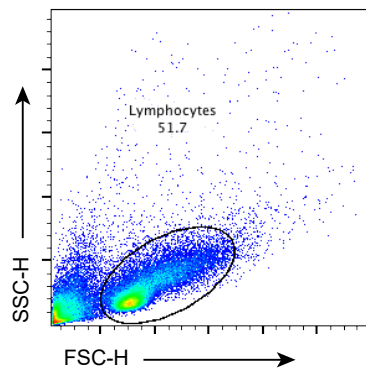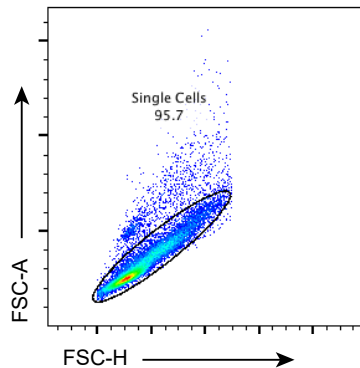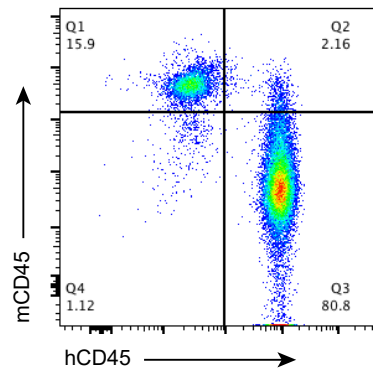

**Supplementary Table S1. Primer sequences for qRT-PCR assay.**

| <b>qRT-PCR primer sequence</b> |                 |                            |
|--------------------------------|-----------------|----------------------------|
| Primers                        | Forward/Reverse | 5'-3'                      |
| $\beta$ -actin                 | F               | AGCGAGCATCCCCCAAAGTT       |
|                                | R               | GGGCACGAAGGCTCATCATT       |
| COX10                          | F               | AGGTTGCGTAGGAGGCTCTGTC     |
|                                | R               | GCTGTGTGACATACATGCGTTTGAG  |
| MPC1                           | F               | CGAAGCAAGGATTTCCGGGACTAC   |
|                                | R               | TTGATGGCAGCAATGGGAAGACC    |
| SDHD                           | F               | CTTGTCACCGAGCCACCATTCTG    |
|                                | R               | GGAATAGTCCATCGCAGAGCAAGG   |
| MDH1                           | F               | CGTCAGGGACATCTGGTTTGGAAC   |
|                                | R               | GGAACACCATAGGAGTTGCCATCAG  |
| PDHA1                          | F               | CACAGACCATCTCATCACAGCCTAC  |
|                                | R               | CCTCCTTTCCCTTTAGCACAAACCTC |
| CS                             | F               | TGCCCTTTCCGACCCTTACCTG     |
|                                | R               | TGTGTTAGCCAGACAAGCACTTCC   |

**Supplementary Table 2. Clinical characteristics of a T-ALL patient whose blast cells were employed to establish PDX model.**

| <b>Disease Characteristics</b>                   | <b>Specific information</b>                        |
|--------------------------------------------------|----------------------------------------------------|
| Phenotype                                        | T-ALL                                              |
| Gender                                           | Male                                               |
| Age (years)                                      | 31                                                 |
| WBC                                              | 289.44*10 <sup>9</sup> /L                          |
| HGB                                              | 129 g/L                                            |
| PLT                                              | 11*10 <sup>9</sup> /L                              |
| LDH                                              | 2091 U/L                                           |
| Percentage of blast cells<br>in bone marrow      | 92.5%                                              |
| Percentage of blast cells<br>in peripheral blood | 92%                                                |
| Karyotype                                        | TCRB, TCRG, TCRD rearrangement positive            |
| Genetic alterations                              | NOTCH1 nonsense mutation, PTEN frameshift mutation |
| Xenograft engraftment method                     | Tail vein injection                                |
